# Supplementary material for: Bodyweight and Combined Training Reduce Chronic Low-Grade Inflammation and Improve Functional Fitness of Postmenopausal Women
Source: MDPI journal article supplement (doi:10.3390/sports10100143), 2022-09-23
Supplement: s1 [file s1]

**Table S1.** Description of the combined training sessions conducted over 24 weeks.

| Combined Training | Part 1                                                                                                       | Part 2                                                                      |                                                                             | Part 3                                                                                             |                                                                                                    | Part 4                                                     |
|-------------------|--------------------------------------------------------------------------------------------------------------|-----------------------------------------------------------------------------|-----------------------------------------------------------------------------|----------------------------------------------------------------------------------------------------|----------------------------------------------------------------------------------------------------|------------------------------------------------------------|
|                   | Mobility exercises for the cervical, shoulder, hip and ankle joints<br><br>10 squats<br><br>10 jumping jacks | Phase 1 (1-18 session)                                                      | Phase 2 (18-36 session)                                                     | Phase 1 (1-18 session)                                                                             | Phase 2 (18-36 session)                                                                            | Intermittent running                                       |
|                   |                                                                                                              | Interval Walking<br>(30 seconds walking alternated with 30 seconds running) | Interval Walking<br>(30 seconds walking alternated with 30 seconds running) | Vertical Supine                                                                                    | Horizontal Supine                                                                                  |                                                            |
|                   |                                                                                                              |                                                                             |                                                                             | Leg Extension                                                                                      | Leg Press 45°                                                                                      |                                                            |
|                   |                                                                                                              |                                                                             |                                                                             | Neutral Rowing                                                                                     | Pronated Rowing                                                                                    |                                                            |
|                   |                                                                                                              |                                                                             |                                                                             | Deadlift                                                                                           | Smith Squat                                                                                        |                                                            |
|                   |                                                                                                              |                                                                             |                                                                             | Lat Pull Down (Pronated)                                                                           | Lat Pull Down (Neutral)                                                                            |                                                            |
|                   |                                                                                                              |                                                                             |                                                                             | Smith bilateral calf raise                                                                         | Unilateral calf raise on step                                                                      |                                                            |
|                   |                                                                                                              |                                                                             |                                                                             | Shoulder press (Pronated)                                                                          | Shoulder press (Neutral)                                                                           |                                                            |
|                   |                                                                                                              |                                                                             |                                                                             | Stiff                                                                                              | Bilateral bridge                                                                                   |                                                            |
|                   | Total time: 5 min; 3-5 exercises per joint; 1 set of 8 seconds                                               | Total time: 12 min; OMINI-GSE: 6/7                                          | Total time: 12 min; OMINI-GSE: 6/7                                          | Total time: 16 min; 2 sets of 8/12 repetitions; 1 minute per station; Density: 1/1; OMINI-GSE: 7/9 | Total time: 16 min; 2 sets of 8/12 repetitions; 1 minute per station; Density: 1/1; OMINI-GSE: 7/9 | Total time: 5 min; 5/8 times; Density: 1/1; OMINI-GSE: 7/8 |
|                   | Mobility exercises for the cervical, shoulder, hip and ankle joints<br><br>10 squats<br><br>10 jumping jacks | 36-54 sessões                                                               | 54-72 sessões                                                               | 36-54 sessões                                                                                      | 54-72 sessões                                                                                      | Intermittent running                                       |
|                   |                                                                                                              | Interval Walking<br>(40 seconds walking alternated with 20 seconds running) | Interval Walking<br>(40 seconds walking alternated with 20 seconds running) | Vertical Supine                                                                                    | Horizontal Supine                                                                                  |                                                            |
|                   |                                                                                                              |                                                                             |                                                                             | Leg Extension                                                                                      | Leg Press 45°                                                                                      |                                                            |
|                   |                                                                                                              |                                                                             |                                                                             | Neutral Rowing                                                                                     | Pronated Rowing                                                                                    |                                                            |
|                   |                                                                                                              |                                                                             |                                                                             | Deadlift                                                                                           | Smith Squat                                                                                        |                                                            |
|                   |                                                                                                              |                                                                             |                                                                             | Lat Pull Down (Pronated)                                                                           | Lat Pull Down (Neutral)                                                                            |                                                            |
|                   |                                                                                                              |                                                                             |                                                                             | Bilateral calf raise on step                                                                       | Unilateral calf raise on step                                                                      |                                                            |
|                   |                                                                                                              |                                                                             |                                                                             | Shoulder press (Pronated)                                                                          | Shoulder press (Neutral)                                                                           |                                                            |
|                   |                                                                                                              |                                                                             |                                                                             | Stiff                                                                                              | Bilateral bridge                                                                                   |                                                            |
|                   | Total time: 5 min; 3-5 exercises per joint; 1 set of 8 seconds                                               | Total time: 12 min; OMINI-GSE: 6/8                                          | Total time: 12 min; OMINI-GSE: 6/8                                          | Total time: 16 min; 2 sets of 8/12 repetitions; 1 minute per station; Density: 1/1; OMINI-GSE: 7/9 | Total time: 16 min; 2 sets of 8/12 repetitions; 1 minute per station; Density: 1/1; OMINI-GSE: 7/9 | Total time: 5 min; 5/8 times; Density: 1/1; OMINI-GSE: 7/8 |

**Table S2.** Description of the bodyweight training sessions conducted over 24 weeks

| Bodyweight training                                            | Part 1                                                                                                          | Part 2                                                                                                                         |                                                                                                                  | Part 3                                                                                             |                                                                                                    | Part 4                                                     |
|----------------------------------------------------------------|-----------------------------------------------------------------------------------------------------------------|--------------------------------------------------------------------------------------------------------------------------------|------------------------------------------------------------------------------------------------------------------|----------------------------------------------------------------------------------------------------|----------------------------------------------------------------------------------------------------|------------------------------------------------------------|
|                                                                | Mobility exercises for the cervical, shoulder, hip and ankle joints<br><br>10 squats<br><br>10 jumping jacks    | Phase 1 (1-18 session)                                                                                                         | Phase 2 (18-36 session)                                                                                          | Phase 1 (1-18 session)                                                                             | Phase 2 (18-36 session)                                                                            | Intermittent running                                       |
|                                                                |                                                                                                                 | 10-meter sprint with 5-second rest                                                                                             | Two 10-meter sprint with 5-second rest                                                                           | Adapted pull up with neutral distance between hands (pronated)                                     | Adapted pull up with neutral distance between hands (pronated)                                     |                                                            |
|                                                                |                                                                                                                 | Fast anterior and posterior displacement over the line marked on the floor                                                     | Fast anterior and posterior displacement over two lines 5 centimeters apart                                      | Front plank (30 cm bench)                                                                          | Front plank associated to the side plank (30 cm bench)                                             |                                                            |
|                                                                |                                                                                                                 |                                                                                                                                |                                                                                                                  | Dynamic quadruped exercise (1 limb movement)                                                       | Dynamic quadruped exercise (2 limbs movement)                                                      |                                                            |
|                                                                |                                                                                                                 | Lateral displacement, 10-meter distance                                                                                        | Lateral displacement in and out over a distance of 15 meters                                                     | Bilateral bridge                                                                                   | Unilateral bridge                                                                                  |                                                            |
|                                                                |                                                                                                                 |                                                                                                                                |                                                                                                                  | Adapted pull up with neutral distance between hands (pronated)                                     | Adapted pull up with short distance between hands (pronated)                                       |                                                            |
|                                                                |                                                                                                                 | Five repetitions of Jumping Jack and 2 seconds pause in moderate speed                                                         | Ten repetitions of Jumping Jack and 2 seconds pause in moderate speed                                            | Lunge                                                                                              | Reverse lunge                                                                                      |                                                            |
|                                                                | Push ups on 40 cm table                                                                                         |                                                                                                                                |                                                                                                                  | Push-ups on a 40 cm table with distance between hands alternating between long and short           |                                                                                                    |                                                            |
|                                                                | Lateral raising of the upper limbs (moderate speed)                                                             | Lateral raising of the upper limbs (fast speed)                                                                                | Goblet squat                                                                                                     | Goblet squat associated with deadlift                                                              |                                                                                                    |                                                            |
|                                                                | Total time: 5 min; 3-5 exercises per joint; 1 set of 8 seconds                                                  | Total time: 12 min; 2 times in each exercise; 1 minute and 20 seconds per station; Density: 1/1; OMINI-GSE: 6/7                | Total time: 12 min; 2 times in each exercise; 1 minute and 20 seconds per station; Density: 1/1; OMINI-GSE: 6/7  | Total time: 16 min; 2 sets of 8/12 repetitions; 1 minute per station; Density: 1/1; OMINI-GSE: 7/9 | Total time: 16 min; 2 sets of 8/12 repetitions; 1 minute per station; Density: 1/1; OMINI-GSE: 7/9 | Total time: 5 min; 5/8 times; Density: 1/1; OMINI-GSE: 7/8 |
|                                                                | Mobility exercises for the cervical, shoulder, hip and ankle joints<br><br>10 squats<br><br>10 jumping jacks    | Phase 3 (36-54 session)                                                                                                        | Phase 4 (54-72 session)                                                                                          | Phase 3 (36-54 session)                                                                            | Phase 4 (54-72 session)                                                                            | Intermittent running                                       |
|                                                                |                                                                                                                 | 10-meter sprint with change of direction                                                                                       | Lateral jump on the step                                                                                         | Adapted pull up with distance between hands alternating between long and short (pronated)          | Adapted pull up with distance between hands alternating between long and short (pronated)          |                                                            |
|                                                                |                                                                                                                 | Fast anterior and posterior displacement over two lines 5 centimeters apart associated with ascent and descent on a 20 cm step | Fast anterior and posterior displacement over two lines 5 centimeters apart associated with jump on a 20 cm step | Frontal plank with lateral displacement of the lower limb on the 30 cm bench                       | Front plank with front lower limb elevation on the 30 cm bench                                     |                                                            |
|                                                                |                                                                                                                 | Lateral displacement with change of direction                                                                                  | Lateral displacement with change of direction and coordinated movement of upper limbs                            | Dynamic quadruped exercise (cross patern)                                                          | Mountain Climber                                                                                   |                                                            |
|                                                                |                                                                                                                 | Alternate jumping jack with stationary march at high speed                                                                     | Alternate jumping jack displacement with stationary march at high speed                                          | Unilateral bridge on a 20 cm step                                                                  | Unilateral bridge on a 20 cm step alternating legs                                                 |                                                            |
|                                                                |                                                                                                                 |                                                                                                                                |                                                                                                                  | Adapted pull up with short distance between hands (pronated)                                       | Adapted pull up with short distance between hands (pronated)                                       |                                                            |
|                                                                |                                                                                                                 | Frontal and lateral raising of the upper limbs alternated with one leg                                                         | Frontal and lateral raising of the upper limbs alternated with one leg associated with displacement              | Goblet squat associated with two-step lateral displacement                                         | Goblet squat associated with displacement in different directions                                  |                                                            |
|                                                                |                                                                                                                 |                                                                                                                                |                                                                                                                  | Push ups on 30 cm bench                                                                            | Push-up on the 30 cm bench associated with upper limb movement to touch the shoulder               |                                                            |
|                                                                |                                                                                                                 |                                                                                                                                |                                                                                                                  | Goblet squat associated with reverse lunge                                                         | Goblet squat at maximum speed with 2-second pause every five repetitions                           |                                                            |
| Total time: 5 min; 3-5 exercises per joint; 1 set of 8 seconds | Total time: 12 min; 2 times in each exercise; 1 minute and 20 seconds per station; Density: 2/1; OMINI-GSE: 6/8 | Total time: 12 min; 2 times in each exercise; 1 minute and 20 seconds per station; Density: 2/1; OMINI-GSE: 6/8                | Total time: 16 min; 2 sets of 8/12 repetitions; 1 minute per station; Density: 1/1; OMINI-GSE: 7/9               | Total time: 16 min; 2 sets of 8/12 repetitions; 1 minute per station; Density: 1/1; OMINI-GSE: 7/9 | Total time: 5 min; 5/8 times; Density: 1/1; OMINI-GSE: 7/8                                         |                                                            |
